# Supplementary material for: Differential Patterns of Impaired Cardiorespiratory Fitness and Cardiac Autonomic Dysfunction in Recently Diagnosed Type 1 and Type 2 Diabetes
Source: Oxford University Press journal article supplement (doi:10.2337/dc16-1898), 2016-11-29
Supplement: dc161898supplementarydata.pdf [file dc161898supplementarydata.pdf]

SUPPLEMENTARY DATA

**Supplementary Table 1.** Antidiabetic and antihypertensive drugs.

|                               | <b>Control 1</b> | <b>Type 1 diabetes</b> | <b>Control 2</b> | <b>Type 2 diabetes</b> |
|-------------------------------|------------------|------------------------|------------------|------------------------|
| <i>Antidiabetic drugs</i>     |                  |                        |                  |                        |
| Metformin (%)                 | 0                | 14.8                   | 0                | 65.8                   |
| Sulfonylureas (%)             | 0                | 0                      | 0                | 2.7                    |
| DPP4 inhibitors (%)           | 0                | 1.2                    | 0                | 11.8                   |
| GLP-1 receptor agonists (%)   | 0                | 0                      | 0                | 1.6                    |
| <i>Antihypertensive drugs</i> |                  |                        |                  |                        |
| ACE inhibitors/ARBs (%)       | 5.0              | 8.0                    | 10.0             | 39.0                   |
| Diuretics (%)                 | 2.5              | 1.9                    | 2.5              | 19.8                   |
| β blockers (%)                | 5.0              | 1.9                    | 7.5              | 19.3                   |
| Sympatholytic drugs (%)       | 0                | 0                      | 0                | 0.5                    |
| Calcium channel blockers (%)  | 5.0              | 0.6                    | 7.5              | 11.8                   |

ACE, angiotensin converting enzyme; ARB, angiotensin receptor blocker; DPP4, dipeptidyl peptidase 4; GLP-1, glucagon-like peptide-1.

SUPPLEMENTARY DATA

**Supplementary Table 2.** Cardiorespiratory and metabolic parameters in the four groups studied.

|                                                           | <b>Control 1</b> | <b>Type 1 diabetes</b>        | <b>Control 2</b> | <b>Type 2 diabetes</b>        |
|-----------------------------------------------------------|------------------|-------------------------------|------------------|-------------------------------|
| Initial respiratory exchange ratio (RER <sub>min</sub> )  | 0.79 (0.77-0.86) | 0.83 (0.79-0.87) <sup>1</sup> | 0.80 (0.77-0.86) | 0.81 (0.78-0.86) <sup>2</sup> |
| Maximal respiratory exchange ratio (RER <sub>max</sub> )  | 1.19 (1.15-1.27) | 1.19 (1.14-1.26)              | 1.19 (1.14-1.24) | 1.18 (1.14-1.22)              |
| Delta respiratory exchange ratio (ΔRER)                   | 0.41 (0.35-0.45) | 0.36 (0.31-0.44)              | 0.40 (0.33-0.45) | 0.37 (0.31-0.41)              |
| Resting lactate (Lac <sub>min</sub> ) (mmol/l)            | 0.60 (0.60-0.80) | 0.90 (0.68-1.10)              | 0.70 (0.63-0.88) | 0.90 (0.70-1.10)              |
| Maximal lactate production (Lac <sub>max</sub> ) (mmol/l) | 7.40 (5.70-8.75) | 5.60 (4.60-6.90) <sup>1</sup> | 5.30 (4.80-6.30) | 4.80 (3.60-5.90) <sup>#</sup> |
| Delta lactate (ΔLac) (mmol/l)                             | 6.80 (4.90-5.20) | 4.75 (3.68-6.03) <sup>1</sup> | 4.50 (3.93-5.75) | 3.80 (2.60-5.10) <sup>#</sup> |

Median (1<sup>st</sup>-3<sup>rd</sup> quartiles); <sup>1</sup>P<0.05 vs Control 1, <sup>2</sup>P<0.05 vs Control 2 and <sup>#</sup>P<0.05 vs type 1 diabetes; All analyses were adjusted for sex, age, BMI, HbA1c, and smoking status.
